# Supplementary material
Source: publisher site journal article supplement (https://www.dovepress.com/article/354436)
Supplement: Supplementary file 1 [file get_supplementary_file.php]

**Supplementary Table 1:** Regressionmodel comparison for the selection of the appropriate distribution

| Distributions | AIC | Log likelihood | Legitimacy test for Weibull distribution |
| --- | --- | --- | --- |
| Gompertz | 1459.8 | -719.9 |  |
| Exponential | 1524.1 | -753.0 |  |
| Lognormal | 1659.3 | -821.6 |  |
| Loglogistic | 1668.6 | -826.3 |  |
| Cox proportional | 2119.1 | -1053.5 |  |
| cWeibull | 1422.7 | -701.4 | Legitimacy of Weibull parameter cannot be established |

c Weibull distribution has got the lowest AIC and highest Log likelihood value. Weibull distribution requires legitimacy tests of Kappa after running general gamma distribution. However, it was not possible to check the legitimacy of the Weibull distributions as gamma distribution was not established for the data set to do the Kappa test. Therefore, Gompertz distribution with the lowest AIC and highest log likelihood was selected as the best model. AIC: Akaike's information criteria

**Supplementary Table 2**: Adjusted hazard ratio of overall death with HIV+TB coinfection accounting for clustering effect, Addis Ababa, Ethiopia, 2011-2018

Gompertz regression --

log relative-hazard form Number of obs=5527

Gamma shared frailty Number of groups =2

Group variable: hospital

No. of subjects =5527 Obs per group: min =1553

No. of failures=98 avg=2763.5

Time at risk=311780.4082 max = 3974

LR chi2(9) =61.14

Log likelihood =-642.20247 Prob > chi2 =0.0000

---------------------------------------------------------------------------------------------------------------------

_t | Haz. Ratio Std. Err. z P>|z| [95% Conf. Interval]

-----------------------+--------------------------------------------------------------------------------------------

TB | 2.531023 0.5618182 4.18 0.000 1.638146 3.910566

Sex | 1.388152 0.3022881 1.51 0.132 0.905892 2.127145

Age group | 1.123896 0.1855821 0.71 0.479 0.8131533 1.553388

Marital Status | 1.090372 0.1276064 0.74 0.460 0.8668785 1.371484

Education | 0.811775 0.0935955 -1.81 0.071 0.6475823 1.01760

Cotrimoxazole | 1.411127 0.3941595 1.23 0.218 0.8162183 2.439641

Strata | 1.268518 0.1098102 2.75 0.006 1.070562 1.503078

Baseline CD4 | 2.408394 0.6191624 3.42 0.001 1.455111 3.986198

BMI | 0.7190458 0.1185363 -2.00 0.045 0.520516 0.993296

_cons | .0002361 .0001731 -11.39 0.000 0.0000561 0.0009938

-------------+------------------------------------------------------------------------------------------

/gamma | -0.0322417 0.0057125 -5.64 0.000 -0.0434379 -0.0210455

/ln_the | -3.00044 1.615759 -1.86 0.063 -6.167268 0.1663887

-------------+------------------------------------------------------------------------------------------

theta | 0.0497652 0.0804085 0.002097 1.181032

--------------------------------------------------------------------------------------------------------

Likelihood-ratio test of theta=0: chibar2(01) = 1.35 Prob>=chibar2 = 0.122

BMI: body mass index, TB: tuberculosis

Strata= year of antiretroviral enrollment (Strata 1: January 2011-December 2013 (ART treatment initiated if CD4 count was below 200), Strata2: January 2014- December 2014 (ART treatment initiated if CD4 count was below 350), Strata 3: January 2015- December 2016 (ART treatment initiated if CD4 count below <500), and Strata 4: January 2017-December 2018 (test and treat policy implemented).

**Supplementary Table 3:** Sensitivity analysis: Adjusted hazard ratio of mortality in HIV+TB coinfection, Addis Ababa, 2011-2018, n=4896

Gompertz regression --

log relative-hazard form Number of obs =4896

Gamma shared frailty Number of groups =2

Group variable: hospital

No. of subjects =4896 Obs per group: min =1402

No. of failures =68 avg =2448

Time at risk=279177.9165 max=3494

LR chi2(7)=33.45

Log likelihood=-454.7135 Prob > chi2=0.0000

*---------------------------------------------------------------------------------------------------------------------*

_t | Haz. Ratio Standard Err. z P>|z| [95% Conf. Interval]

*---------------------------+----------------------------------------------------------------------------------------*

TB | 3.729103 0.9819856 5.00 0.000 2.225652 6.248151

Sex | 1.225457 0.3214581 0.78 0.438 0.7328473 2.049192

Age group | 1.39829 0.2744587 1.71 0.088 0.9517485 2.054341

Marital status | 1.10211 0.1537541 0.70 0.486 0.838445 1.448688

Education | .8790553 0.120229 -0.94 0.346 0.6723521 1.149306

BMI | .7641346 0.1532774 -1.34 0.180 0.5157364 1.132171

Cotrimoxazole | 1.027568 0.331874 0.08 0.933 0.5456293 1.935189

_cons | .0003374 0.000273 -9.88 0.000 0 .0000691 0.001647

---------------------------+----------------------------------------------------------------------------------------

/gamma | -0.0300826 0.0063458 -4.74 0.000 -0.0425202 -0.017645

/ln_the | -2.696603 1.68159 -1.60 0.109 -5.992458 -0.5992525

---------------------------+----------------------------------------------------------------------------------------

Theta | 0.0674342 0.1133967 0.0024975 1.820757

Likelihood-ratio test of theta=0: chibar2(01) = 1.16 Prob>=chibar2 = 0.141

Sensitivity analysis was done by excluding CD4 cell count <50 from both the coinfection and HIV+Only groups. Mortality in HIV+TB coinfection was more than three times higher with an adjusted hazard ratio of 3.72(2.22-6.24) after exclusion of the CD4 <50 cell.

BMI: body mass index, TB: tuberculosis

**Supplementary Table 4:** Comparison of background characteristics of HIV patients tested for TB and not tested for TB at ART enrollment, 2011-2019 in Addis Ababa, n=7192

| Characterstics | Tested for TB  N=7038 | Not tested for TB  N=154 | P-value |
| --- | --- | --- | --- |
| Sex |  |  | 0.563 |
| Male | 4181(59.46) | 88(57.14) |  |
| Female | 2851(40.54) | 66(42.86) |  |
| Age group |  |  | 0.082 |
| 15-29 | 1863(26.47) | 53(34.42) |  |
| 30-44 | 3800(53.99) | 72(46.75) |  |
| 45>= | 1375(19.54) | 29(18.83) |  |
| Marital status |  |  | 0.003 |
| Never married | 1669(25.10) | 32(21.77) |  |
| Married | 3047(45.82) | 69(46.94) |  |
| Divorced  /Separated | 1275(19.17) | 19(12.93) |  |
| Widowed | 659(9.91) | 27(18.37) |  |
| Education |  |  | 0.814 |
| No education | 1051(15.87) | 23(16.20) |  |
| Primary | 2228(33.64) | 49(34.51) |  |
| Secondary | 2363(35.68) | 46(32.39) |  |
| Teritiary | 981(14.81) | 24(16.90) |  |
| Facility type |  |  | 0.104 |
| Hospital | 4951(70.35) | 99(64.29) |  |
| Health center | 2087(29.65) | 55(35.71) |  |
| BMI |  |  | 0.183 |
| <18 | 1323(20.32) | 31(23.13) |  |
| 18-25 | 3850(59.13) | 84(62.69) |  |
| >25 | 1338(20.55) | 19(14.18) |  |
| Cotrimoxazol initation |  |  | 0.050 |
| Yes | 5343(76.17) | 119(83.22) |  |
| No | 1672(23.83) | 24(16.78) |  |

BMI: body mass index. TB: tuberculosis, to check potential selection bias due to exclusion of 154 samples selected background characteristics were compared.

TB: tuberculosis, ART: antiretroviral therapy.

**Supplementary Table 5*.*** Proportion of death after ART initiation by HIV coinfection status, in Addis Ababa, Ethiopia, (September 2011 to December 2018), n=7038

| n (%), 95%: CI | | | | | | |
| --- | --- | --- | --- | --- | --- | --- |
| Outcome | Coinfected with TB | | | HIV+Only (without TB) | | |
| Male  (n=586) | Female  (n=530) | Total  (1116) | Male  (n=2264) | Female  (n=3649) | Total  (n=5906) |
| Primary outcome: Mortality | | | | | | |
| at 6 months | 3.24  [2.07-5.03] | 2.45  [1.4-4.1] | 2.85  [2.0-4.0] | 0.88  [0.57-1.36] | 0.60  [0.39-0.91] | 0.71  [0.52-0.95] |
| at 12 months | 3.92  [2.61-5.84] | 3.39  [2.14-5.33] | 3.65  [2.69-4.92] | 1.10  [0.74-1.16] | 0.76  [0.53-1.10] | 0.89  [0.68-1.17] |
| at 60 months | 4.78  [3.32-6.85] | 3.96  [2.59-6.00] | 4.39  [3.33-5.73] | 1.28  [0.97-1.71] | 1.54  [1.11-2.15] | 1.38  [1.12-1.72] |
| Overall death | 4.94  [3.45-7.02] | 3.94  [2.58-5.98] | 4.46  [3.33-5.82] | 1.76  [1.29-2.40] | 1.42  [1.08-1.86] | 1.55  [1.26-1.90] |

Coinfection= HIV positives with TB coinfection, HIV+Only= HIV positives without TB coinfection, ART: antiretroviral therapy, TB: tuberculosis
